# Supplementary material for: An effective strategy for the preparation of intrinsic low-kand ultralow-loss dielectric polysiloxanes at high frequency by introducing trifluoromethyl groups into the polymers
Source: Royal Society of Chemistry journal article supplement (doi:10.1039/d0py00909a), 2020-01-01
Supplement: d0py00909a1.pdf [file d0py00909a1.pdf]

Electronic supplementary information for:

**An Effective Strategy for the Preparation of Intrinsic Low-k and Ultralow-loss Dielectric Polysiloxanes at High Frequency by Introducing Trifluoromethyl Groups into the Polymers**

Fengping Liu, Xingrong Chen, Linxuan Fang, Jing Sun\* and Qiang Fang\*

Key Laboratory of Synthetic and Self-Assembly Chemistry for Organic Functional Molecules, Center for Excellence in Molecular Synthesis, Shanghai Institute of Organic Chemistry, University of Chinese Academy of Sciences, Chinese Academy of Sciences, 345 Lingling Road, Shanghai 200032, P. R. China.

## Supplementary Figures

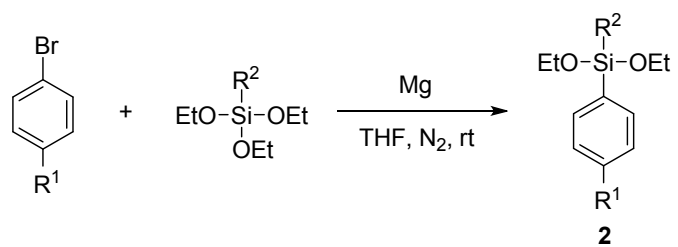

**2a**,  $R^1 = -\text{OCH}_3$ ,  $R^2 = -\text{CH}_3$ ;

**2b**,  $R^1 = -\text{CF}_3$ ,  $R^2 = -\text{CH}_3$ ;

**2c**,  $R^1 = -\text{CF}_3$ ,  $R^2 = p\text{-trifluoromethylphenyl}$

**Scheme 1.** Procedure for the Synthesis of **2**

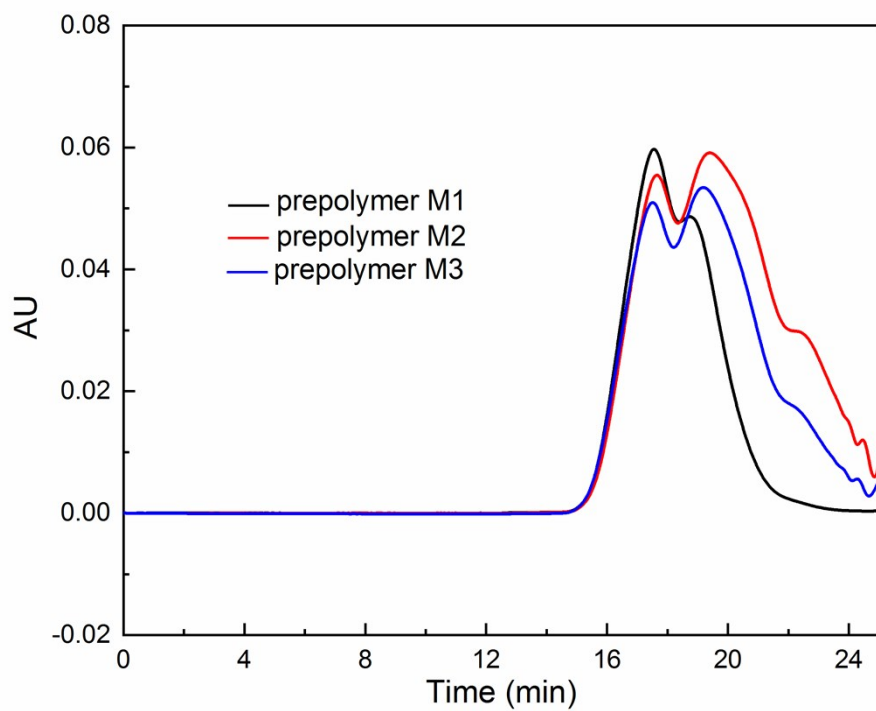

**Figure S1.** GPC curves of prepolymers **M1~M3**.

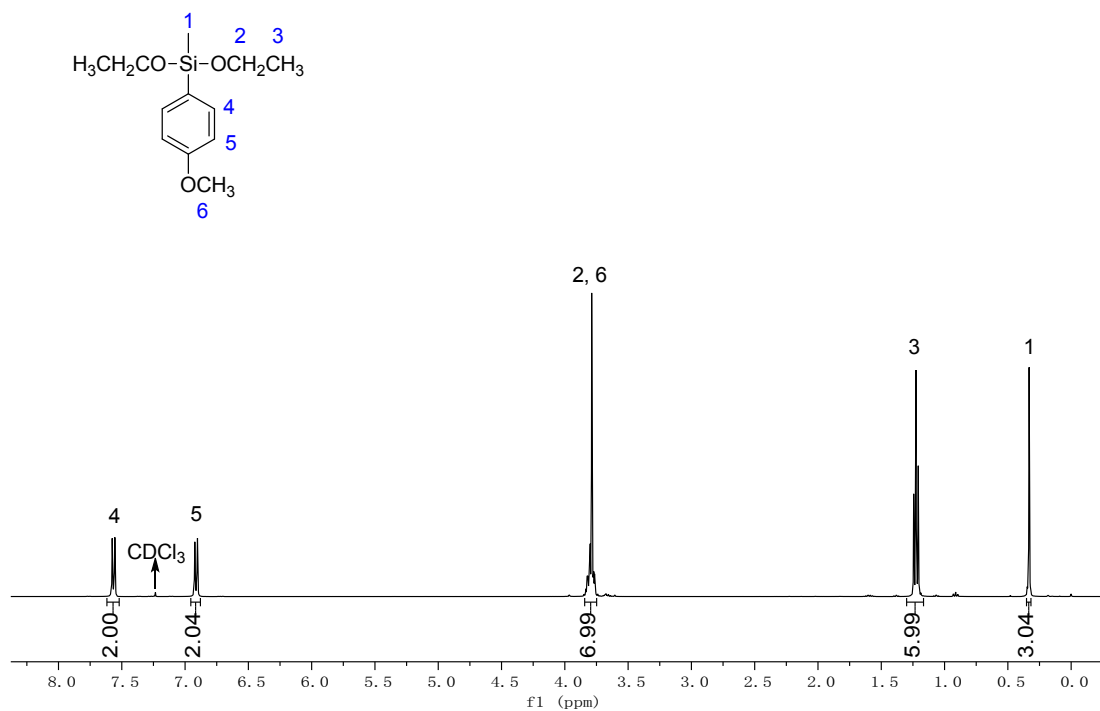

**Figure S2.**  $^1\text{H}$  NMR (400 MHz,  $\text{CDCl}_3$ ) spectrum of **2a**.

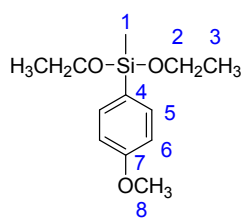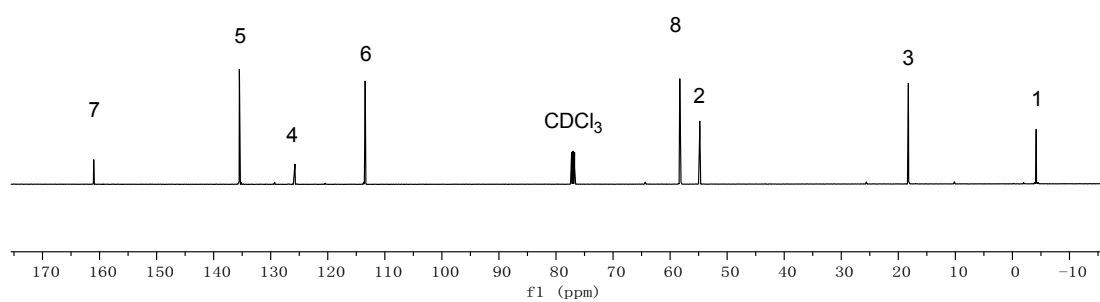

**Figure S3.** <sup>13</sup>C NMR (126 MHz, CDCl<sub>3</sub>) spectrum of **2a**.

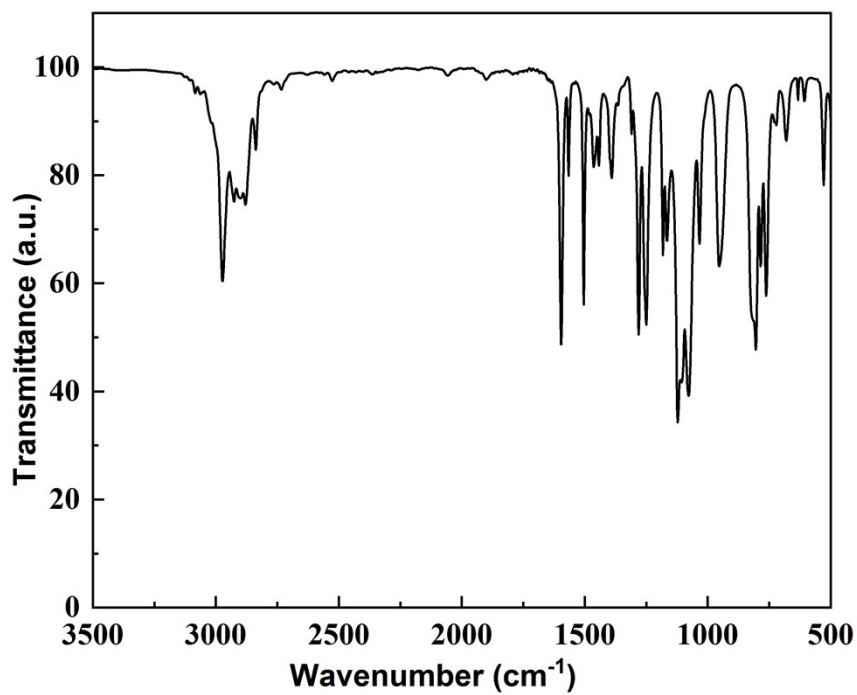

Figure S4. FT-IR spectrum of 2a.

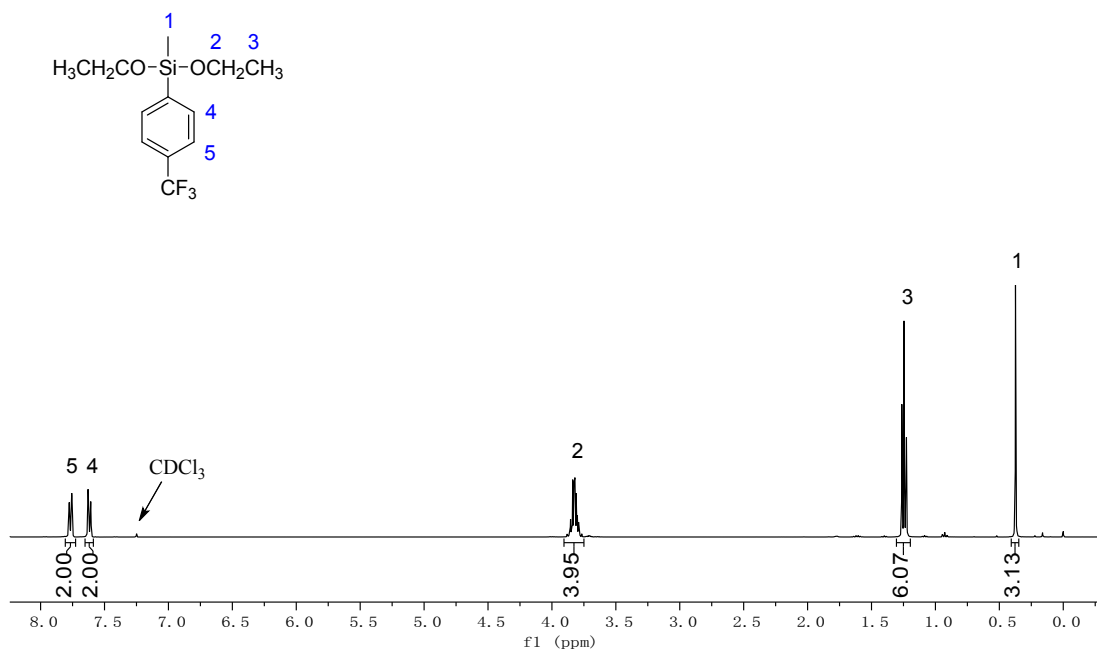

Figure S5. <sup>1</sup>H NMR (400 MHz, CDCl<sub>3</sub>) spectrum of 2b.

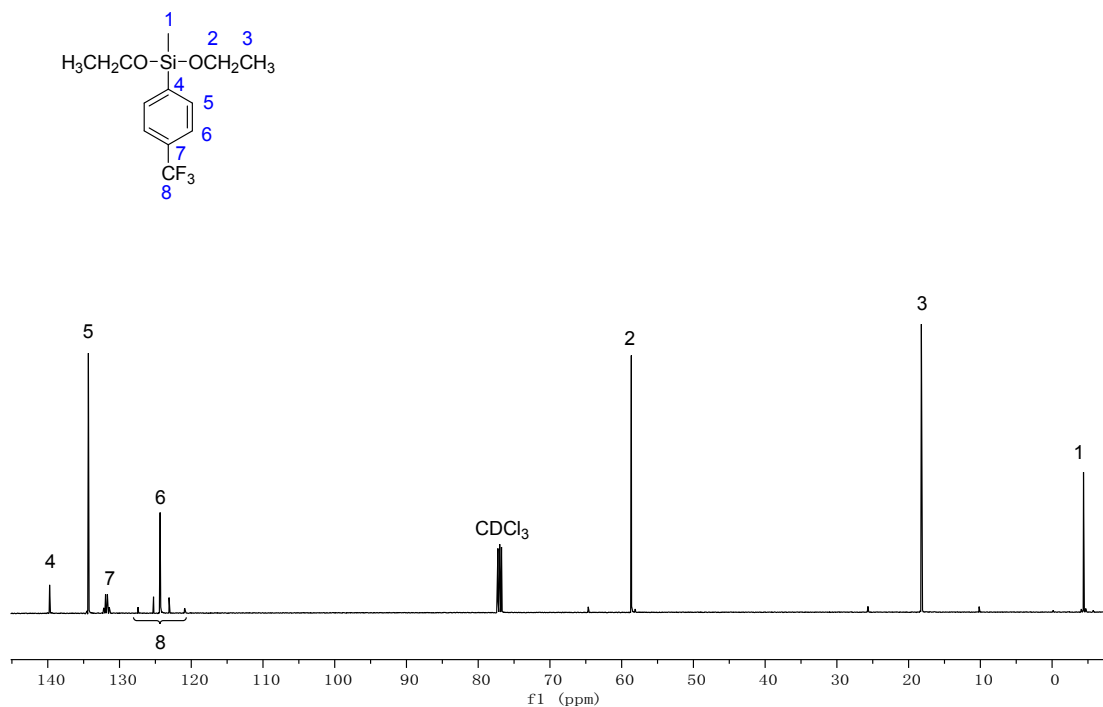

**Figure S6.**  $^{13}\text{C}$  NMR (126 MHz,  $\text{CDCl}_3$ ) spectrum of **2b**.

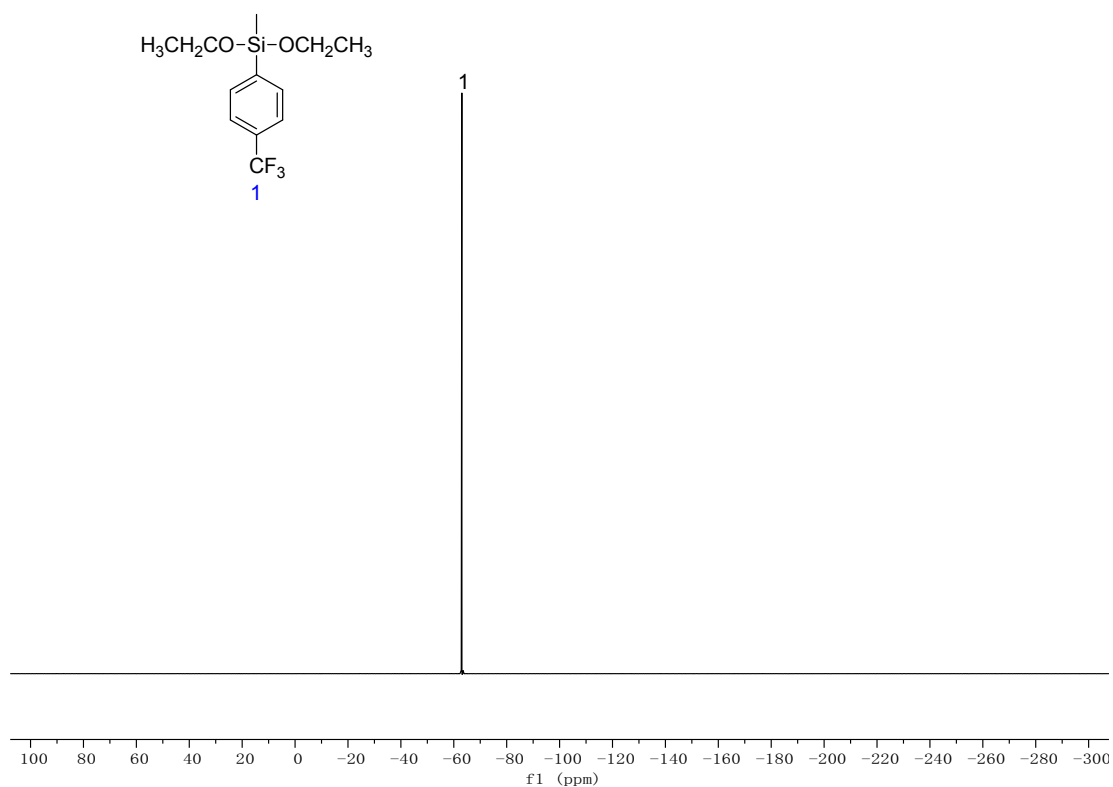

**Figure S7.**  $^{19}\text{F}$  NMR (376 MHz,  $\text{CDCl}_3$ ) spectrum of **2b**.

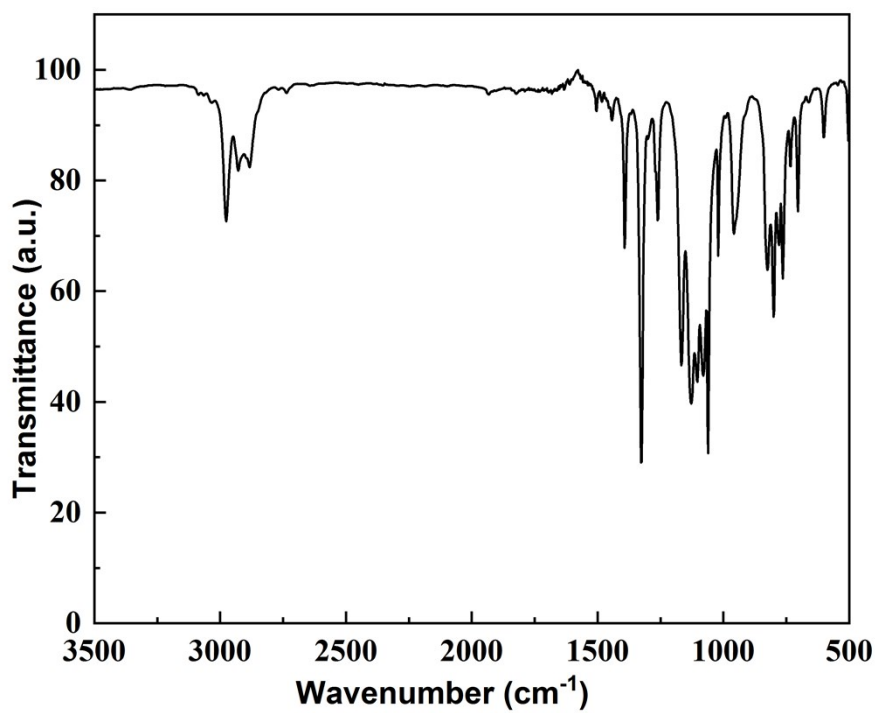

**Figure S8.** FT-IR spectrum of **2b**.

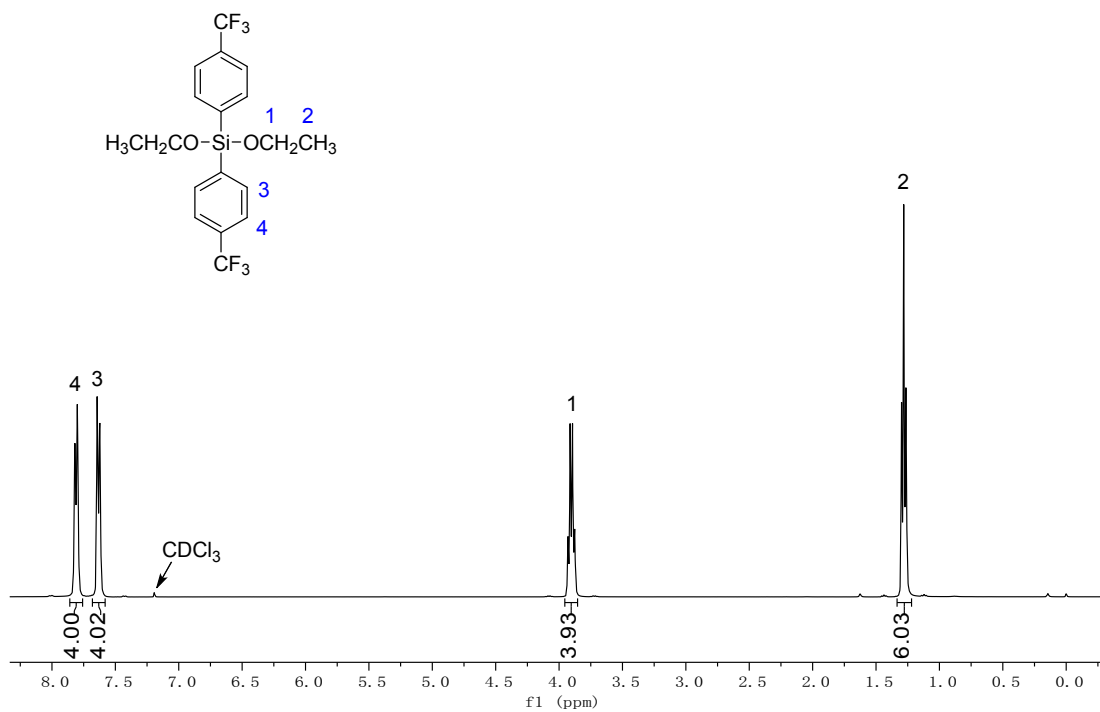

**Figure S9.**  $^1\text{H}$  NMR (400 MHz,  $\text{CDCl}_3$ ) spectrum of **2c**.



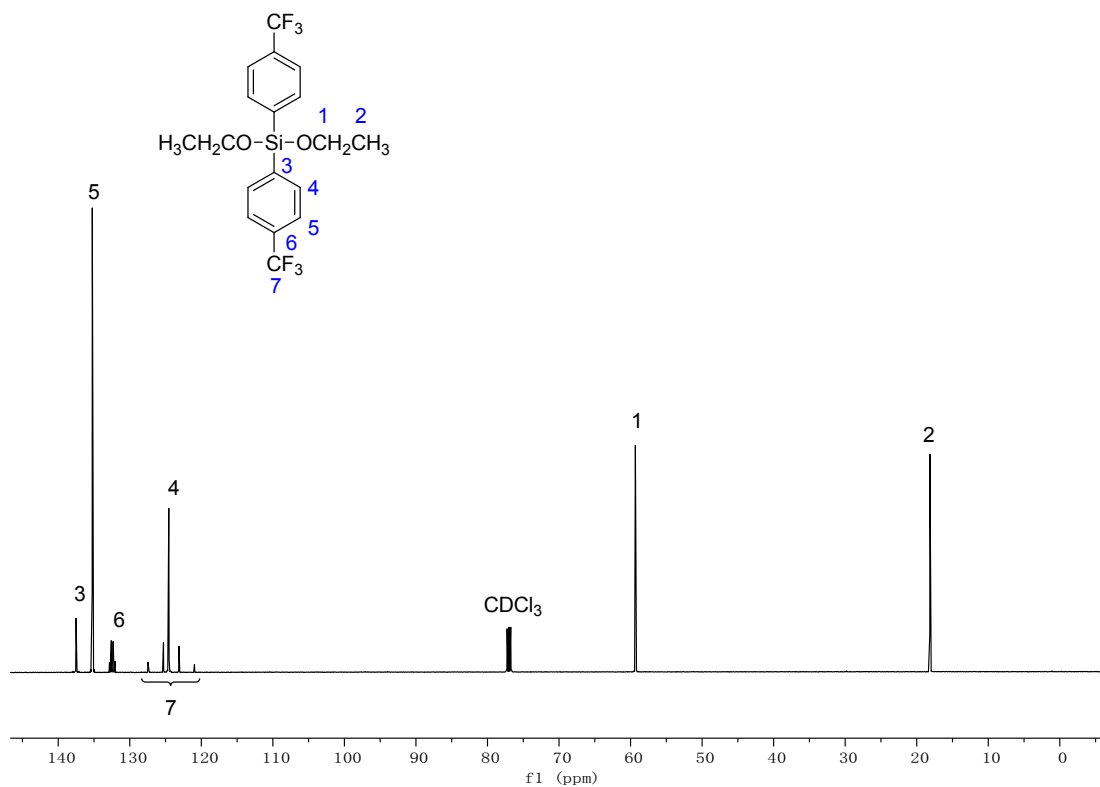

**Figure S10.** <sup>13</sup>C NMR (126 MHz, CDCl<sub>3</sub>) spectrum of **2c**.

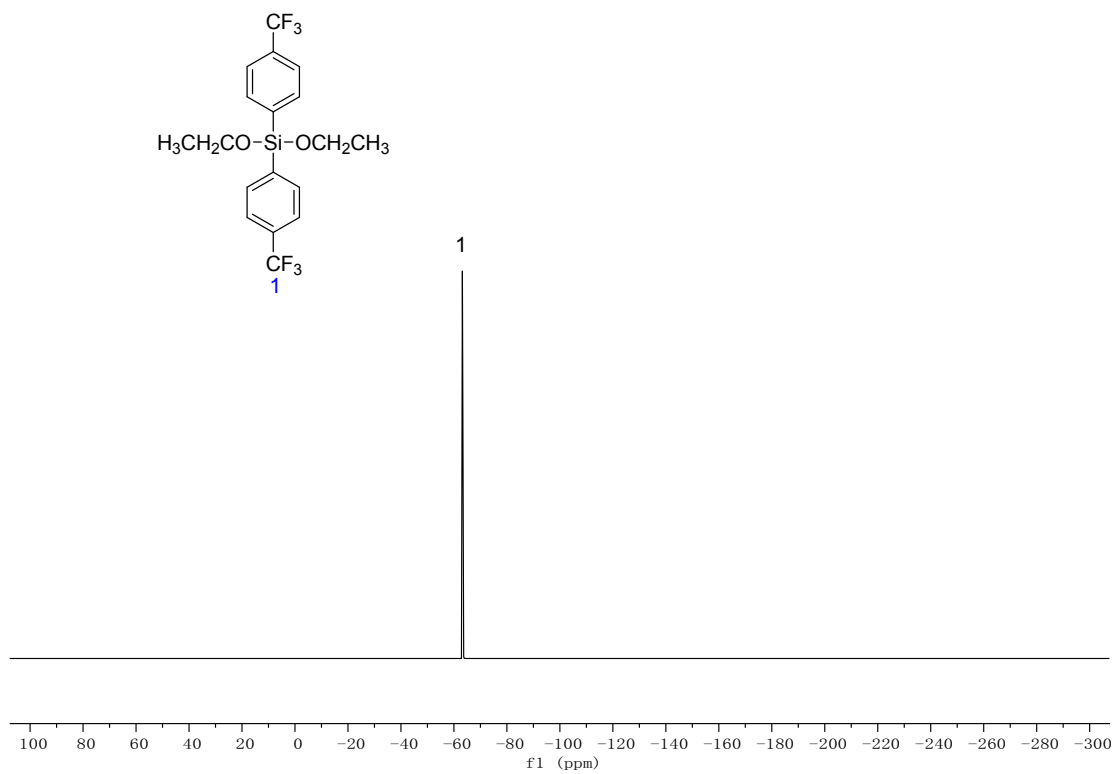

**Figure S11.**  $^{19}\text{F}$  NMR (376 MHz,  $\text{CDCl}_3$ ) spectrum of **2c**.

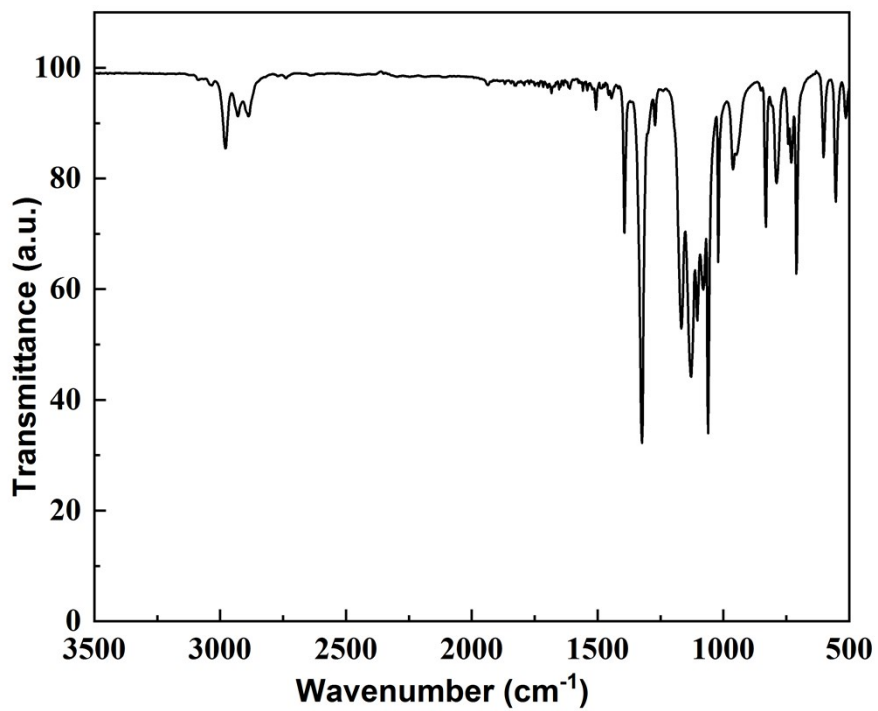

**Figure S12.** FT-IR spectrum of **2c**.

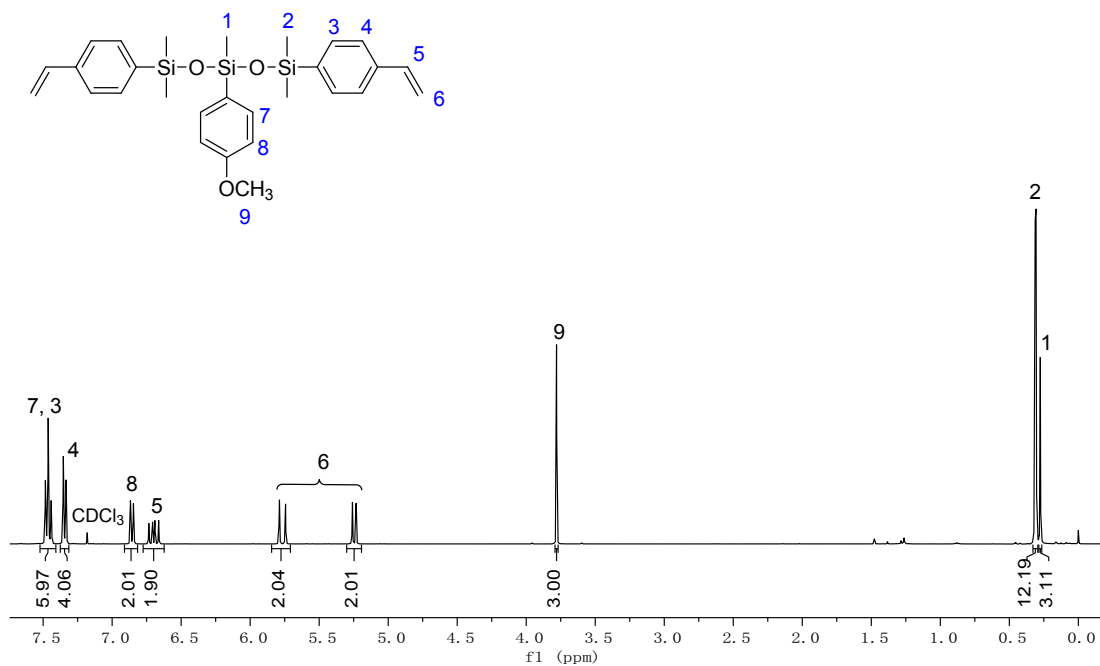

**Figure S13.** <sup>1</sup>H NMR (400 MHz, CDCl<sub>3</sub>) spectrum of **M1**.

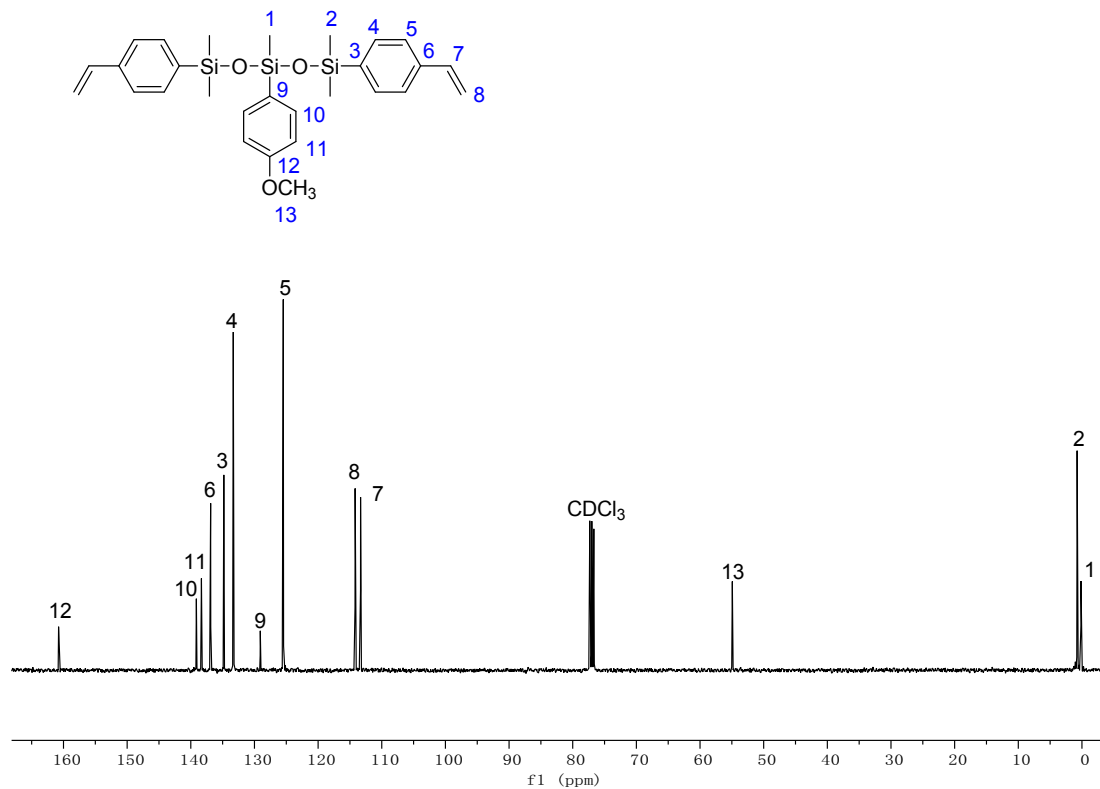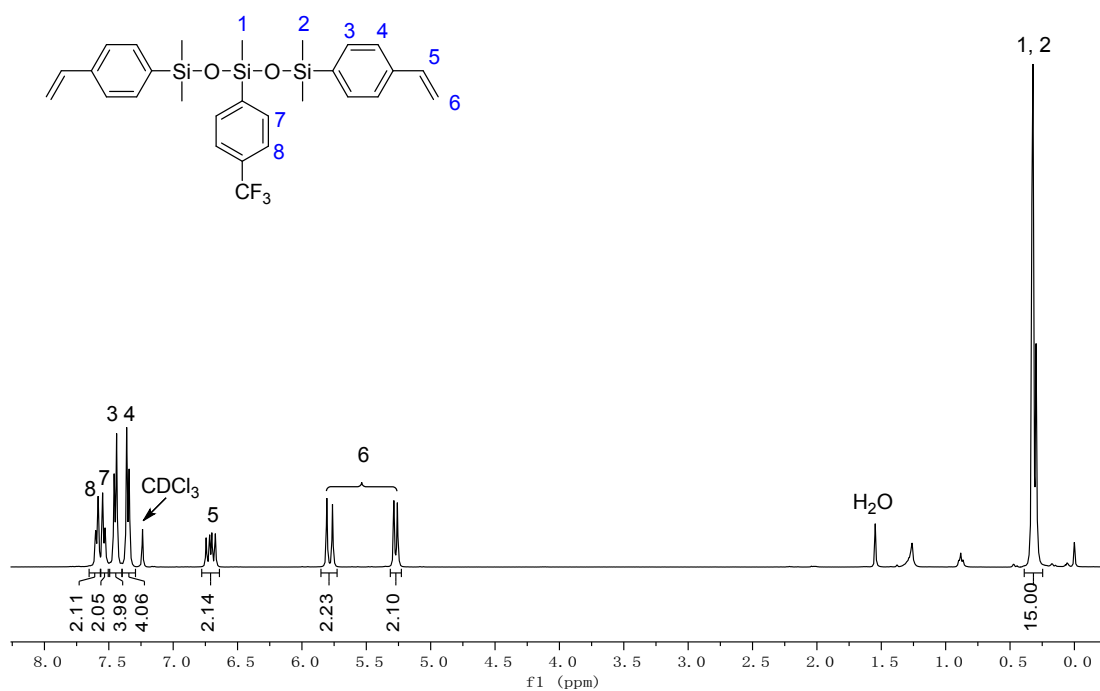

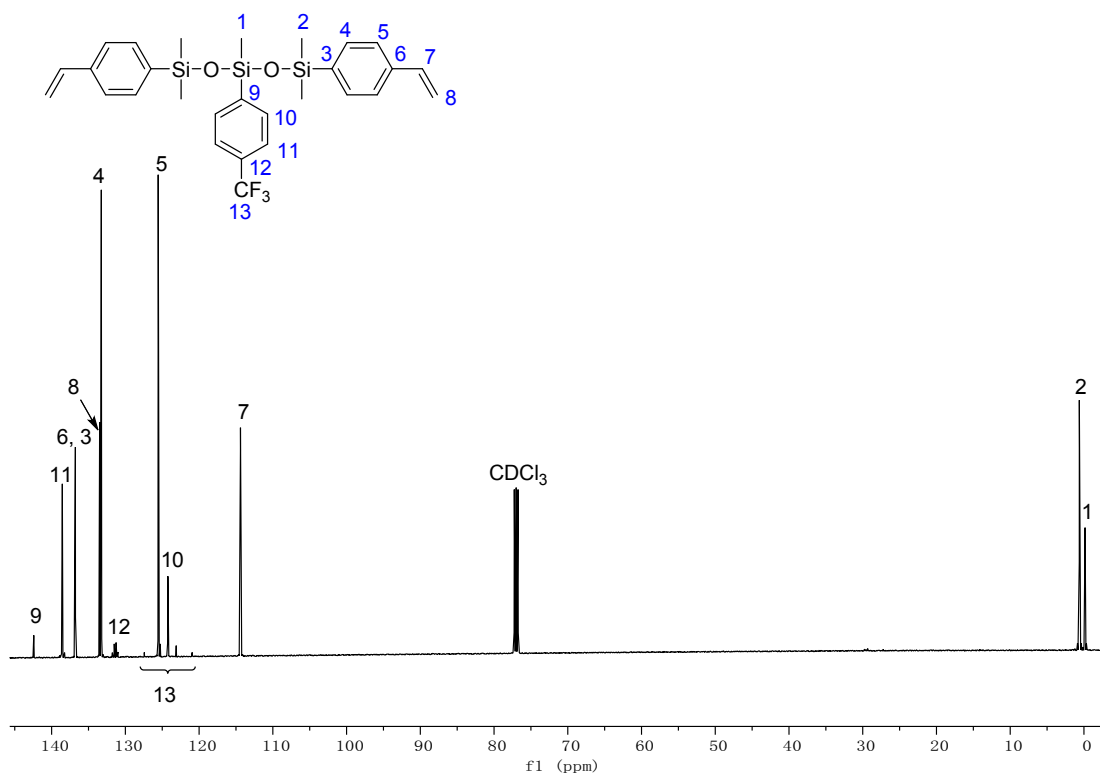

**Figure S16.** <sup>13</sup>C NMR (126 MHz, CDCl<sub>3</sub>) spectrum of M2.

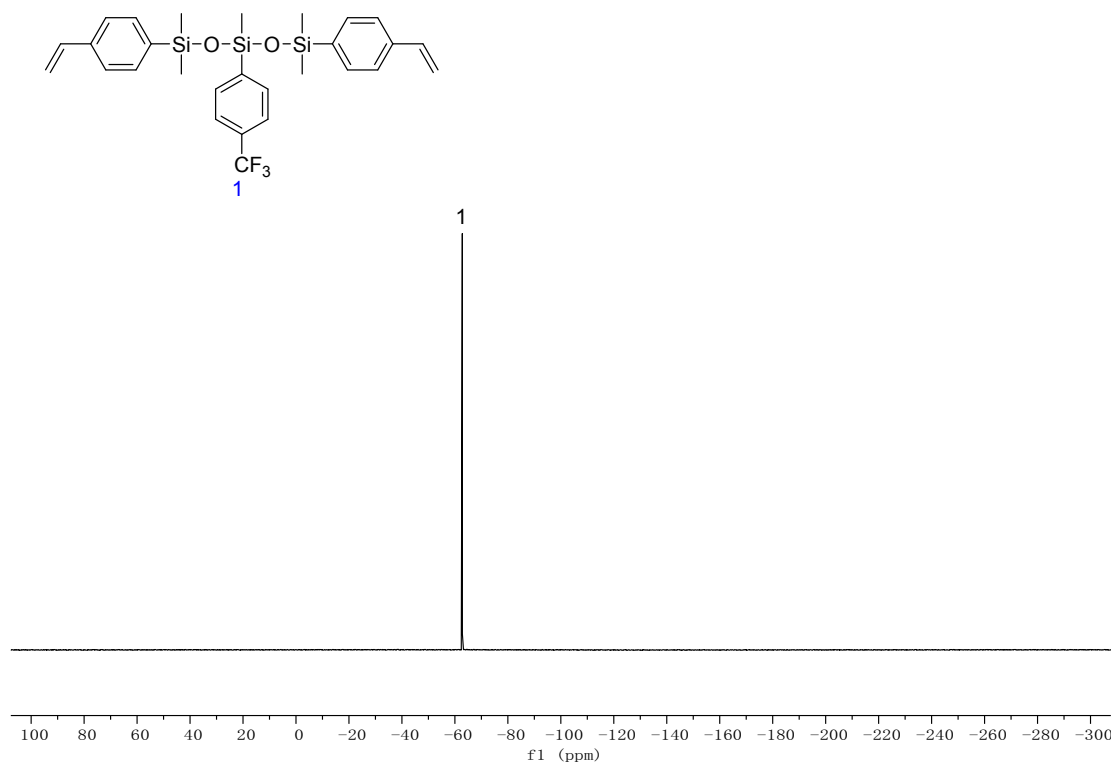

**Figure S17.**  $^{19}\text{F}$  NMR (376 MHz,  $\text{CDCl}_3$ ) spectrum of **M2**.

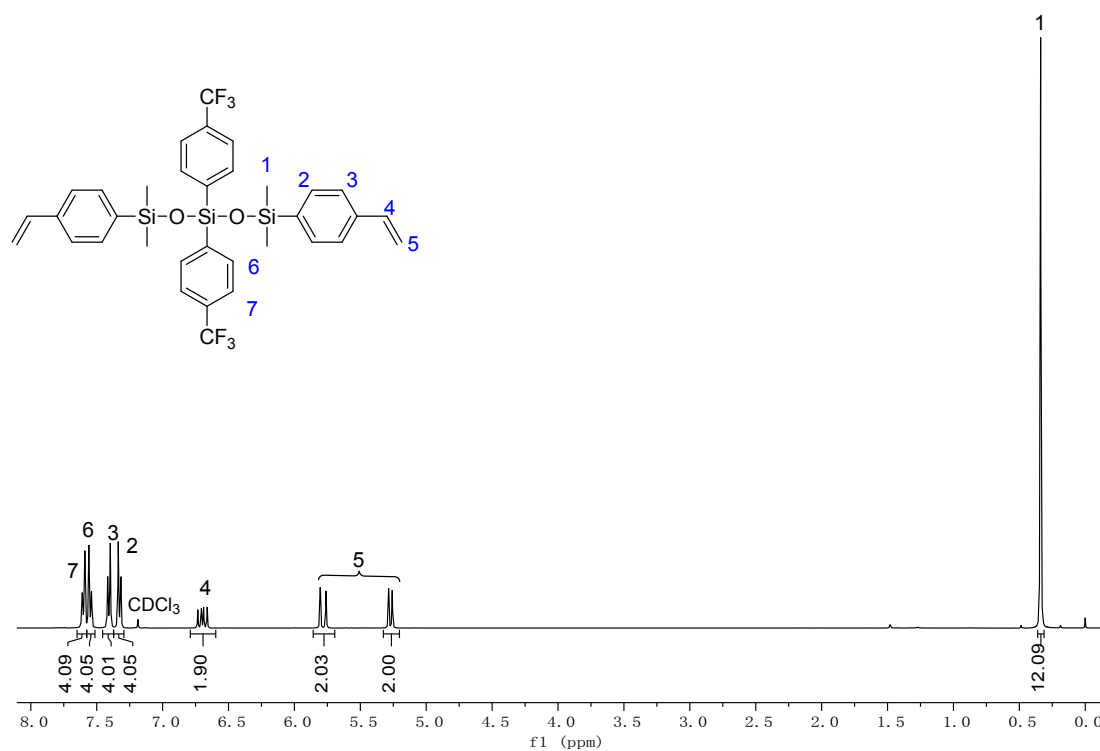

**Figure S18.**  $^1\text{H}$  NMR (400 MHz,  $\text{CDCl}_3$ ) spectrum of **M3**.

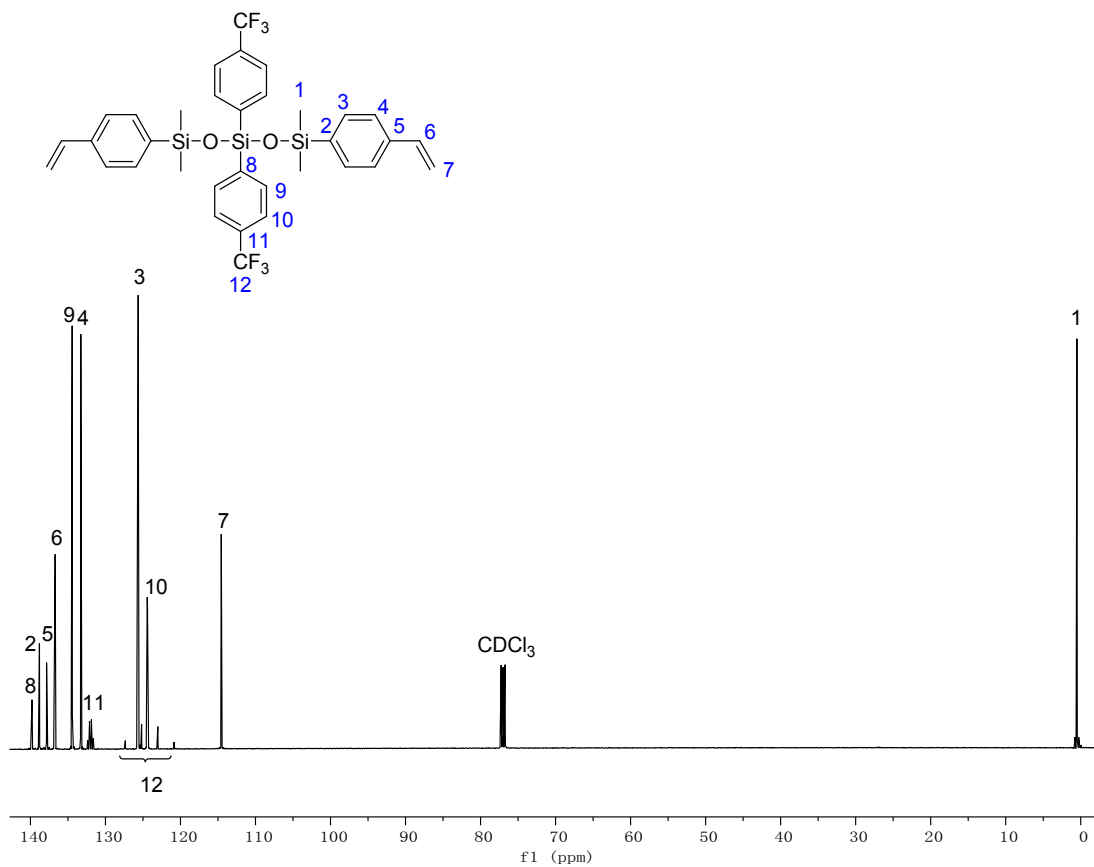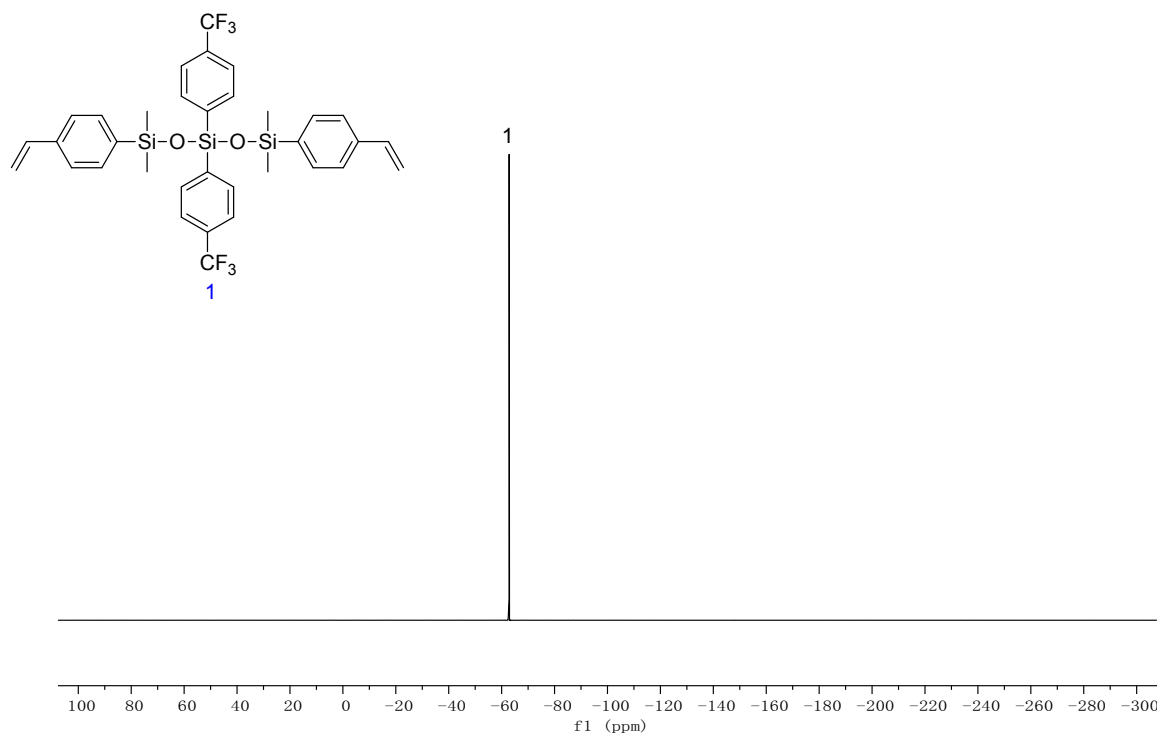

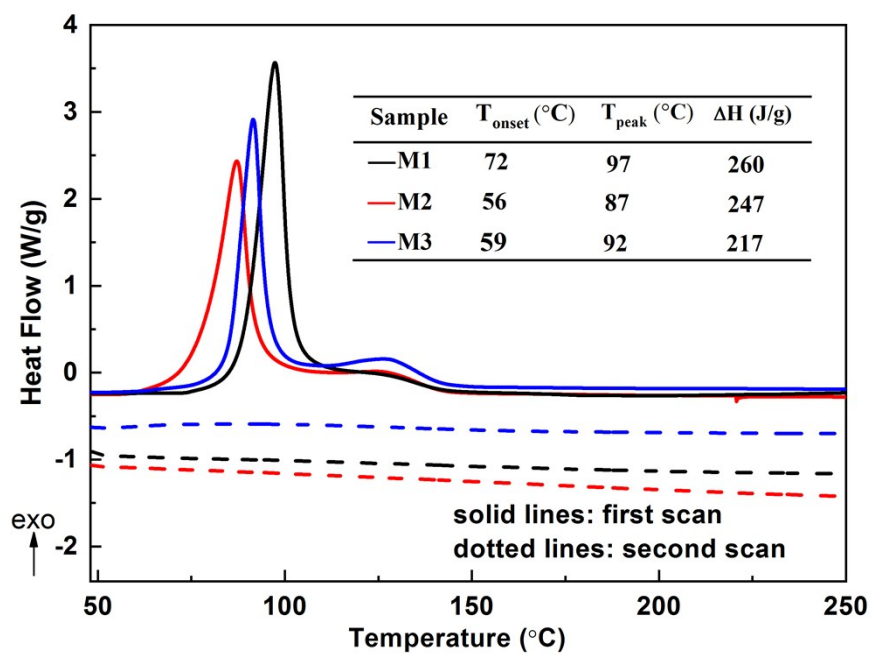

**Figure S21.** DSC traces of monomers with an initiator of AIBN at a heating rate of 10 °C min<sup>-1</sup> in N<sub>2</sub>.
